# Supplementary material for: Concatemer Assisted Stoichiometry Analysis (CASA): targeted mass spectrometry for protein quantification
Source: PubMed Central journal article supplement (PMC11291133; doi:10.1101/2024.07.26.605382), 2024-07-27
Supplement: NIHPP2024.07.26.605382v1-supplement-3.pdf [file NIHPP2024.07.26.605382v1-supplement-3.pdf]

**S1 Figure. Western blot analysis the immuno-precipitation of TAF-tagged kinetochore subunits. TAF tag: 3xFlag-tev-ProteinA. The purified samples were then processed and analyzed by data-dependent acquisition MS analysis.**

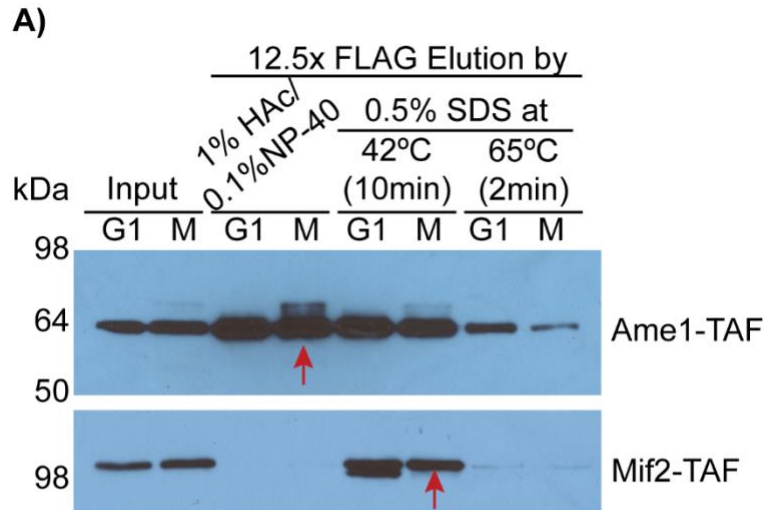

Red arrows indicate the samples processed for DDA-MS.

**A)** M2 FLAG purification of Ame1-TAF and Mif2-TAF from  $\alpha$  factor (G1) or Cdc20 auxin degradation (M) arrested cells. HACl stands for acetic acid. (Anti-protein A Western blots)

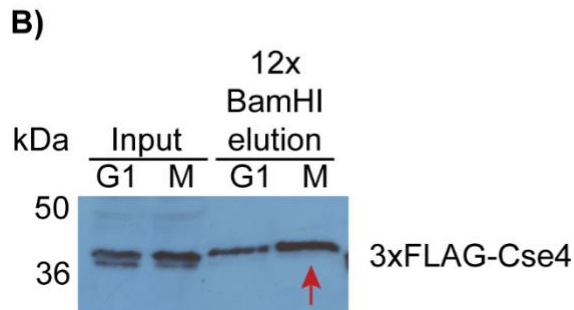

**B)** *Ex vivo* reconstitution of G1 or M phase arrested 3xFLAG-Cse4 strain. (Anti-FLAG Western blot)

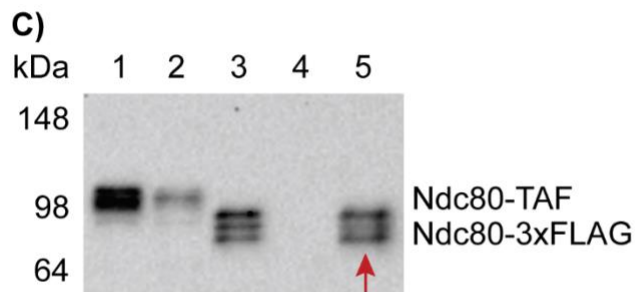

**C)** 2-step purification of Ndc80 from M phase arrested Ndc80-TAF strain. The first step was done using IgG beads, followed by TEV protease cleavage to cut at the TEV site between protein A and 3xFLAG. The second step was done using M2 FLAG beads, followed by elution with 1% acetic acid/0.1% NP-40. (Anti-FLAG Western blot)

- 1 Input
- 2 IgG flowthrough
- 3 6x TEV protease elution
- 4 M2 FLAG flowthrough
- 5 15x FLAG elution

"x" indicate loading relative to input.

↑ indicate sample used for DDA-MS.

**S2 Figure. Evaluate CKP expression in yeast by anti-Flag WB and purification via anti-Flag resins.**

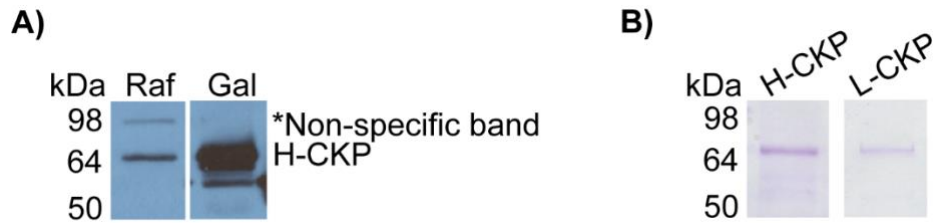

- A)** Anti-FLAG Western blot for galactose induction of H-CKP. Raf: raffinose, Gal: galactose.  
**B)** Coomassie brilliant blue staining of H and L-CKP after purification. Staining for L and H-CKP was done on different days on different gels.

**S3 Figure. Absolute quantification of L and H-CKP using a commercially synthesized GST peptide (sequence YGVSR) via external calibration.**

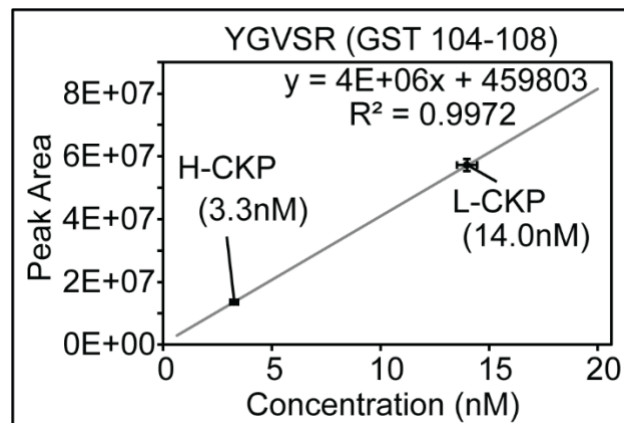

**S4 Figure. The concentration of recombinant GST protein determined by UV-Vis absorption, which was then used to quantify H-CKP and L-CKP by MS.**

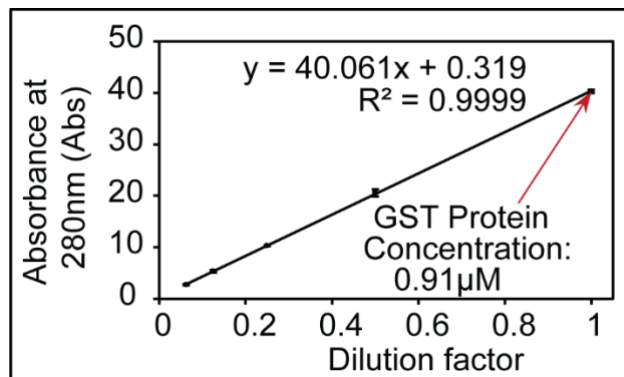

**S5 Figure. Cse4 has 2 calibration curves covering its full AMR, one at a lower concentration below 2.5 nM, one at the higher concentration up to 60 nM.**

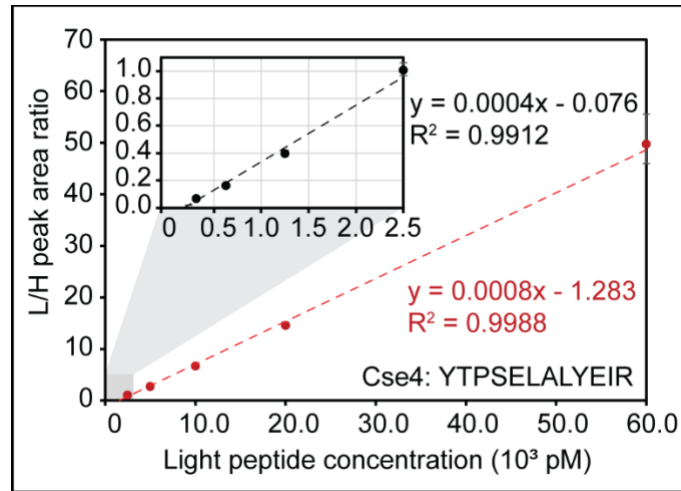

**S6 Figure. Evaluation of *ex vivo* kinetochore reconstitution using Mif2-TAF cell extracts**

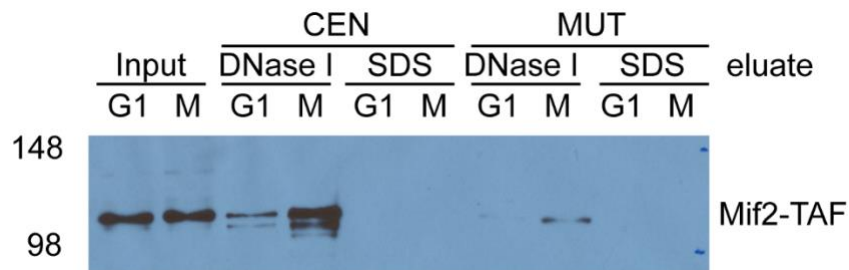

M-phase extract has a stronger Mif2-CEN association than G1 extract. Moreover, DNase-I elution is complete in eluting Mif2 since the subsequent SDS elution yielded much fewer signals. Mif2-CEN association is also specific and reduced by point mutation to the CDE III region in CEN3 (MUT).

**S7 Figure. Htb2 peptide chromatograph shows sample-specific matrix suppression. IS:**  
**Internal standard, referring to Htb2 peptide here.**

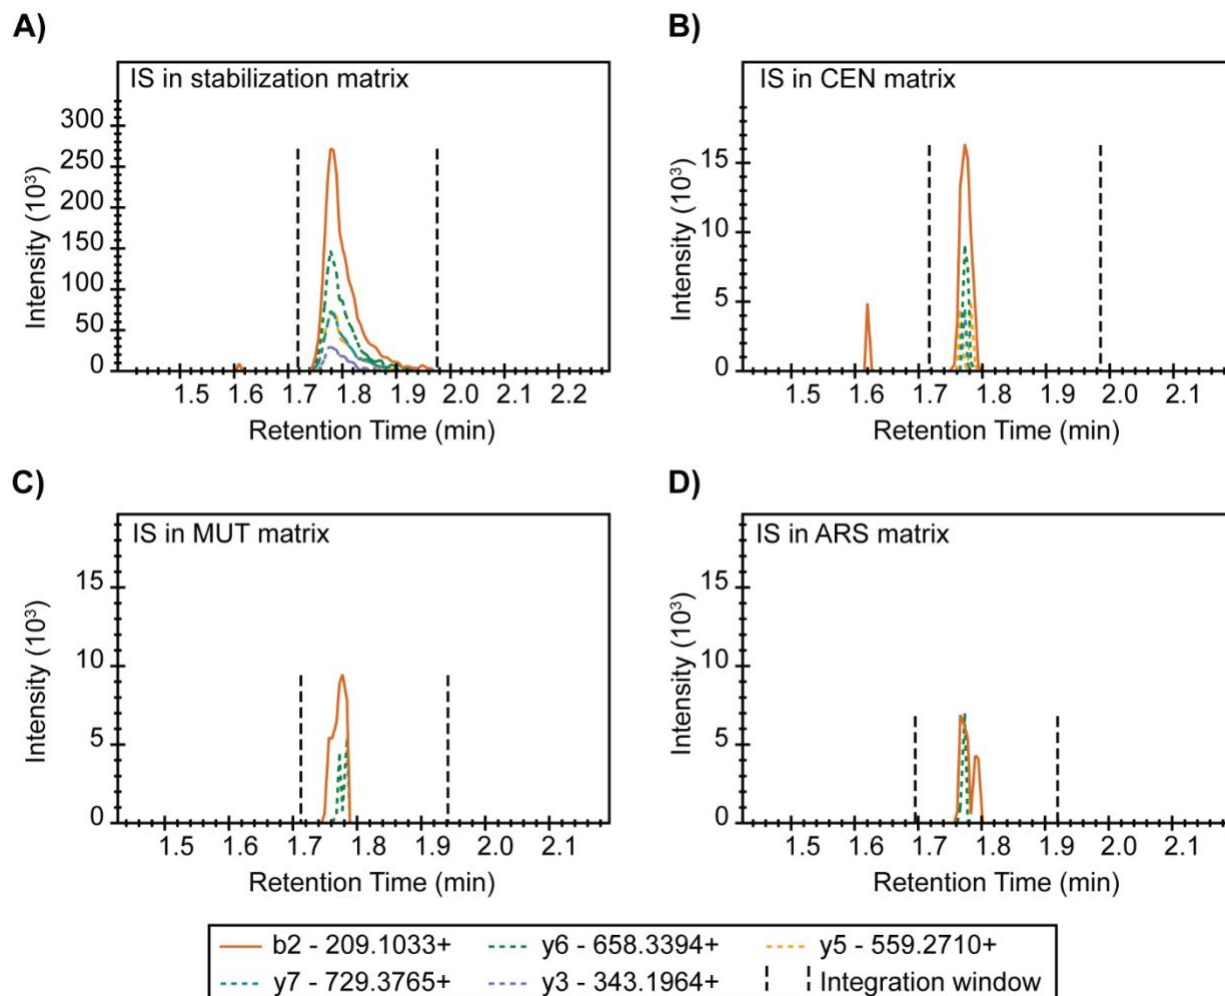

Chromatograms of indicated transition ions of the Htb2 peptide (HAVSEGTR) from the H-CKP. Y-axes indicate signal intensity, and x-axes indicate retention time in minutes. Black dotted lines indicate the integration windows for determining the peak area of each transition ion.

**S8 Figure. Ex vivo reconstitution of kinetochores using G1-phase lysate**

**A)**

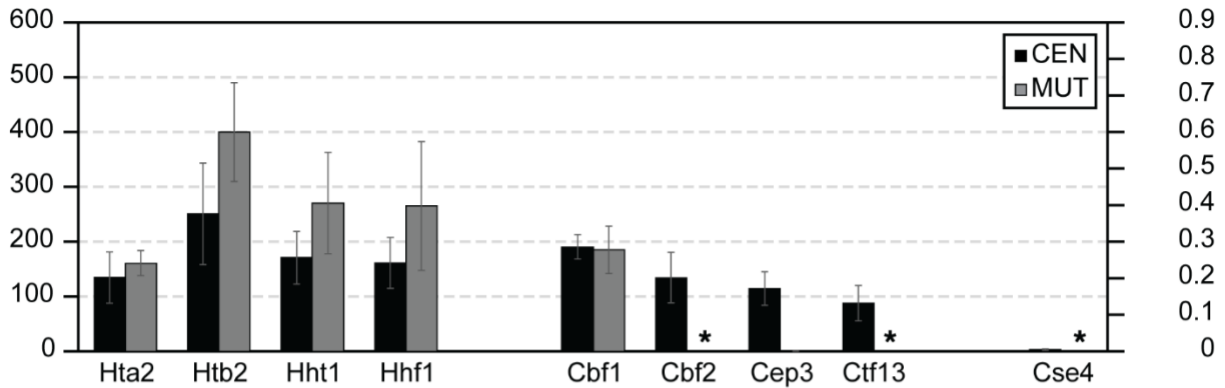

**B)**

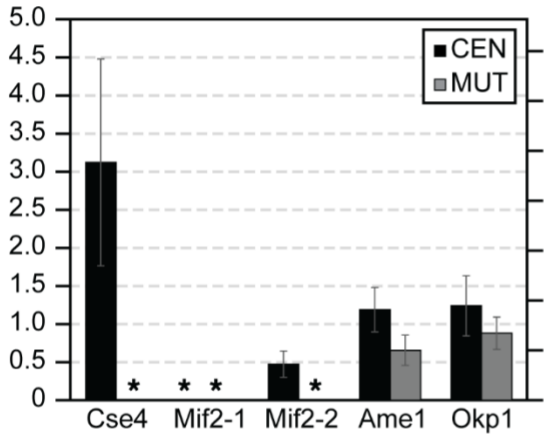

**C)**

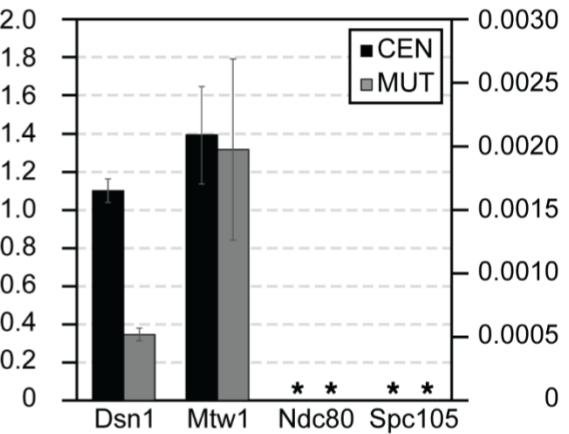

**D)**

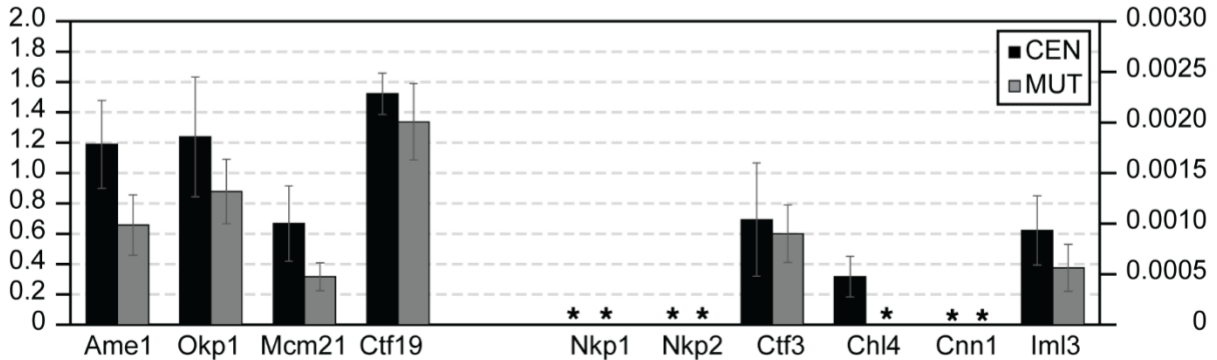

Primary y-axis (left): Normalized concentration (nM)

Secondary y-axis (right): Protein/DNA ratio

\*Below limit of quantification

## S1 Table. Plasmids and yeast strains.

| <b>Plasmid</b> | <b>Description/source</b>                                                                      |
|----------------|------------------------------------------------------------------------------------------------|
| HZE2029        | Lic-2GT from Corbett Lab                                                                       |
| HZE3236        | pRS423-pGAL-GST-tev-HF                                                                         |
| HZE3240        | Addgene 30116, pFastBacCEN3e2_Plus60_tetO2, from Hinshaw: pSMH1717                             |
| HZE3241        | Addgene 30116, pFastBac LIC cloning vector, CEN3e2_Plus60-TetO2-CCGmut, from Hinshaw: pSMH1726 |
| HZE3246        | CEN3-8xLacO-TRP1, from Biggins: pSB964                                                         |
| HZE3361        | pRS423-pGAL-GST-CKP-HF                                                                         |

  

| <b>Yeast Strain</b> | <b>Genotype</b>                                                                                         |
|---------------------|---------------------------------------------------------------------------------------------------------|
| SCY249              | <i>ura3-52 leu2-1 trp1-63 his3-200 lys2-Bgl hom3-10 ade2-1 ade8 sml1Δ::TRP arg4Δ MAT a</i>              |
| HZY1029             | <i>bar1Δ::URA MAT a</i> , W303 in HZY1077                                                               |
| HZY1077             | <i>ade2-1 can1-100 his3-11,15 leu2-3,112 trp1-1 ura3-1 RAD5+</i> , <i>MAT a</i> , W303                  |
| HZY2347             | <i>Cdc20-HA-AID::G418 pGPD1-OsTir1::LEU2 bar1Δ::URA Mif2-TAF::HisMX sml1Δ::TRP, MAT a</i> in SCY249     |
| HZY2461             | <i>Cdc20-HA-AID::G418 pGPD1-OsTir1::LEU2 bar1Δ::URA Ndc80-TAF::G418 sml1Δ::TRP, MAT a</i> in SCY249     |
| HZY2646             | <i>Ame1-TAF::HisMX Cdc20-HA-AID::G418 pGPD1-OsTir1::LEU2 bar1Δ::URA sml1Δ::TRP, MAT a</i> in SCY249     |
| HZY2777             | <i>G418::3xFlag-Cse4 Cdc20-HA-AID::HisMX pGPD1-OsTir1::LEU2 bar1Δ::URA, sml1Δ::TRP, MAT a</i> in SCY249 |
| HZY3059             | HZE3361 in SCY249                                                                                       |

## S2 Table. Peptides identified by Data-Dependent Acquisition MS (See Supplementary Excel file)

**S3 Table. Quantification of light and heavy CKP concentrations using a GST peptide standard.**

| Samples Analyzed                      | Synthetic GST peptide: YGVSR |      |       |       |       |       | Light CKP |       |       | Heavy CKP |        |        |
|---------------------------------------|------------------------------|------|-------|-------|-------|-------|-----------|-------|-------|-----------|--------|--------|
|                                       | 1                            | 2    | 3     | 4     | 5     | 6     | 1         | 2     | 3     | 1         | 2      | 3      |
| Cal. Levels/<br>Repeat                |                              |      |       |       |       |       |           |       |       |           |        |        |
| Conc. (pM)                            | 625                          | 1250 | 2500  | 5000  | 10000 | 20000 | 14491     | 13881 | 13564 | 3073.3    | 3302.9 | 3427.6 |
| Peak area (10 <sup>3</sup> )          | 2567                         | 5746 | 10155 | 23086 | 38492 | 82090 | 59331     | 56842 | 55550 | 12804     | 13740  | 14247  |
| Avg. conc. (pM)                       |                              |      |       |       |       |       | 13978.67  |       |       | 3267.93   |        |        |
| Avg. peak area (10 <sup>3</sup> )     |                              |      |       |       |       |       | 57241     |       |       | 13597     |        |        |
| Std. dev conc.                        |                              |      |       |       |       |       | 471.15    |       |       | 179.72    |        |        |
| Std. dev peak area (10 <sup>3</sup> ) |                              |      |       |       |       |       | 1921      |       |       | 732       |        |        |

**S4 Table. Target inclusion list for PRM-MS (See supplementary Excel file)**

### S5 Table. Isotope incorporation efficiencies of H-CKP

The peak areas shown are the sum of the peak areas of the top 12 transitions.

| <b>Peptide</b> | <b>Heavy area</b> | <b>Light area</b> | <b>% Heavy of total area</b> |
|----------------|-------------------|-------------------|------------------------------|
| HTA2           | 17078343          | 0                 | 100.00                       |
| CTF3           | 20109657          | 0                 | 100.00                       |
| CBF2           | 19143204          | 1570              | 99.99                        |
| NKP1           | 22143101          | 20836             | 99.91                        |
| IML3           | 20163754          | 0                 | 100.00                       |
| HTB2           | 8778000           | 10597             | 99.88                        |
| MCM21          | 32181955          | 1491              | 100.00                       |
| DSN1           | 38273619          | 0                 | 100.00                       |
| MTW1           | 40463111          | 0                 | 100.00                       |
| HHF1           | 24330620          | 0                 | 100.00                       |
| CBF1           | 67708609          | 57839             | 99.91                        |
| CEP3           | 22579733          | 0                 | 100.00                       |
| AME1           | 14451112          | 0                 | 100.00                       |
| CHL4           | 44155600          | 62964             | 99.86                        |
| CTF19          | 27480906          | 1417              | 99.99                        |
| NDC80          | 26923566          | 0                 | 100.00                       |
| CNN1           | 13304552          | 1245              | 99.99                        |
| HHT1           | 29087574          | 0                 | 100.00                       |
| CTF13          | 28351430          | 0                 | 100.00                       |
| MIF2-2         | 30827943          | 105111            | 99.66                        |
| SPC105         | 16052332          | 0                 | 100.00                       |
| OKP1           | 10856738          | 0                 | 100.00                       |
| NKP2*          | 18603646          | 391167*           | 97.94*                       |
| MIF2-1         | 41905182          | 0                 | 100.00                       |
| CSE4           | 56761875          | 2634              | 100.00                       |

\* Most abundant transition (b2) is interfered with by a contaminant.

Actual isotope incorporation > 99%



**S6 Table. Accuracy of calibrators (Tolerance:  $\pm 20\%$ ):**

Gray cells are outside the AMR (Tolerance:  $\pm 20\%$ ). Cells with yellow highlights have %biases between -20% and -15% or 15% and 20%. The rest of the cells have %biases within -15% and 15%.

| Peptide            | Calibrator %Bias |       |      |       |       |       |       |       |       |       |  |
|--------------------|------------------|-------|------|-------|-------|-------|-------|-------|-------|-------|--|
|                    | 78               | 156   | 313  | 625   | 1250  | 2500  | 5000  | 10000 | 20000 | 60000 |  |
| Ame1               | 18.0             | 5.2   | -1.2 | 1.9   | -10.0 | -4.6  | -3.5  | -3.9  | -5.0  | 3.0   |  |
| Cbf1               | 7.7              | 9.2   | -1.6 | -0.7  | -2.5  | -0.6  |       | -6.9  | -8.7  | 4.1   |  |
| Cbf2               |                  |       |      | -3.3  | -6.0  | 7.2   | 8.9   | 3.3   | -13.0 | 2.9   |  |
| Cep3               | 3.3              | 3.1   | -5.9 | 8.4   | -1.2  | -2.0  | 1.7   | 3.3   | -15.1 | 4.4   |  |
| Chl4               | -16.3            | -5.8  | -4.7 | 3.3   | 5.2   | 10.5  | 11.5  | 0.6   | -4.1  | -0.2  |  |
| Cnn1               |                  |       |      |       |       | 15.9  | -14.4 | -6.2  | 4.7   |       |  |
| Cse4               |                  |       | 11.0 | -7.3  | -8.4  | 4.6   |       |       |       |       |  |
| Ctf13              |                  | 0.8   | -8.0 | 2.1   | 0.2   | 1.0   | 5.8   | -0.7  | -1.2  |       |  |
| Ctf19              |                  | 6.5   | 2.6  | 0.5   | 2.3   | -12.5 | 3.9   | -4.1  |       | 0.8   |  |
| Ctf3               | 2.2              | -1.1  | -8.6 | 4.1   | -1.8  | -0.1  | 6.5   | -0.9  |       | -0.4  |  |
| Dsn1               | 8.7              | -1.9  | -2.6 | -2.5  | -7.3  | -1.5  | 6.2   | 1.5   |       | -0.5  |  |
| Hhf1               |                  |       |      |       | 13.4  | -7.4  | -0.5  | -6.7  |       | 1.2   |  |
| Hht1               |                  |       | 0.8  | 3.2   | 2.7   | -2.6  | -3.1  | -1.0  | -0.6  | 0.6   |  |
| Hta2               | 0.7              | 0.7   | -2.9 | 8.4   | -0.1  | -4.0  | 1.5   | -5.1  |       | 0.8   |  |
| Htb2               |                  |       |      | 2.8   | -1.6  | 3.1   | -1.5  | -2.3  | -1.4  | 0.8   |  |
| Iml3               | 0.4              | 0.1   | -4.9 | 11.0  | -3.5  | 2.6   | -1.4  | -0.3  | -6.1  | 2.1   |  |
| Mcm21              | -3.9             | -3.5  | 3.4  | 5.8   | -1.7  | -1.1  | 5.5   | -2.0  | -3.5  | 1.0   |  |
| Mif2-1             |                  |       |      | -9.1  | -1.1  | 4.2   | 1.8   | 5.3   |       | -1.1  |  |
| Mif2-2             | 14.3             | -1.5  | 7.6  | 4.8   | -4.3  | -14.1 |       | -8.7  |       | 2.0   |  |
| Mtw1               |                  |       | 13.7 | -13.1 | -4.3  | 3.7   |       |       |       |       |  |
| Ndc80              | 1.9              | 19.2  | -9.8 | -1.0  | -1.9  | -5.3  | 0.1   | -4.0  |       | 0.9   |  |
| Nkp1               |                  |       |      | -1.8  | -6.1  | 9.1   | 5.5   | 2.8   | -12.6 | 3.0   |  |
| Nkp2               |                  |       | -8.8 | -3.9  | 1.0   | 6.5   | 4.0   | 3.7   | -2.2  | -0.4  |  |
| Okp1               |                  | -11.5 | 2.6  | 8.5   | 0.2   | 4.7   | 0.4   | -0.8  | -5.6  | 1.7   |  |
| Spc105             |                  |       | 1.6  | -4.8  | -1.3  | -0.5  | 3.6   | 2.0   |       | -0.5  |  |
| Cse4 - High range  |                  |       |      |       |       | 10.1  | -3.4  | -4.0  | -4.9  | 2.2   |  |
| Mtw1 - High range  |                  |       |      |       |       | 0.1   | 0.1   | -0.3  | 0.1   |       |  |
| Analyte conc. (pM) | 78               | 156   | 313  | 625   | 1250  | 2500  | 5000  | 10000 | 20000 | 60000 |  |

**S7 Table. Inter-day accuracy of calibrators (Tolerance:  $\pm 20\%$ ):**

Gray cells are outside the AMR (Tolerance:  $\pm 20\%$ ). Cells with yellow highlights have average %biases between -20% and -15% or 15% and 20%. The rest of the cells have average %biases within -15% and 15%.

| Peptide            | Calibrator Avg. %Bias (n = 3) |       |      |       |       |       |       |       |       |       |  |
|--------------------|-------------------------------|-------|------|-------|-------|-------|-------|-------|-------|-------|--|
|                    | 78                            | 156   | 313  | 625   | 1250  | 2500  | 5000  | 10000 | 20000 | 60000 |  |
| Ame1               | 19.5                          | 6.8   | 0.3  | 1.8   | -9.9  | -1.6  | -1.7  | -1.6  | -3.5  | 3.5   |  |
| Cbf1               | 10.2                          | 7.7   | -0.7 | 3.1   | -3.0  | -5.9  |       | 0.5   | -4.1  | 2.0   |  |
| Cbf2               |                               |       |      | -7.3  | -5.4  | 3.3   | 8.2   | 4.8   | -7.6  | -0.5  |  |
| Cep3               | 2.4                           | 8.5   | 2.9  | 7.1   | 1.4   | -1.4  | -2.5  | 1.7   | -12.0 | 6.6   |  |
| Chl4               | -12.7                         | -2.1  | 1.6  | 10.5  | 7.1   | 12.8  | 9.4   | 3.5   | -5.8  | 1.4   |  |
| Cnn1               |                               |       |      |       |       | 16.6  | -14.2 | -4.3  | 12.6  |       |  |
| Cse4               |                               |       | 11.9 | -12.1 | -5.9  | 5.3   |       |       |       |       |  |
| Ctf13              |                               | -4.1  | 5.7  | 8.8   | -0.5  | 6.9   | 1.9   | 0.8   | -2.7  |       |  |
| Ctf19              |                               | 9.9   | 4.3  | -6.9  | -1.5  | -11.9 | 1.0   | 0.3   |       | 2.3   |  |
| Ctf3               | 9.1                           | 2.6   | -0.2 | -1.0  | -0.8  | -1.4  | 4.2   | 0.7   |       | -2.0  |  |
| Dsn1               | 2.7                           | -6.8  | -2.6 | -7.8  | -3.1  | -11.4 | 7.6   | 0.0   |       | 4.0   |  |
| Hhf1               |                               |       |      |       | 15.8  | -7.8  | -3.3  | -2.3  |       | 1.5   |  |
| Hht1               |                               |       | -9.4 | 10.5  | -0.1  | -2.3  | -1.7  | -3.9  | -3.8  | 3.7   |  |
| Hta2               | 2.3                           | 6.5   | 0.4  | 4.6   | 0.3   | -1.0  | -1.3  | -2.1  |       | -0.7  |  |
| Htb2               |                               |       |      | 7.4   | -3.2  | 1.8   | 2.2   | 2.0   | -2.1  | -1.2  |  |
| Iml3               | -10.2                         | -1.7  | -0.3 | 4.5   | -3.6  | -0.4  | -2.4  | -8.3  | -7.5  | -0.3  |  |
| Mcm21              | -5.6                          | -2.2  | 1.7  | 5.1   | -5.7  | 1.0   | 0.0   | -5.7  | -5.4  | 6.6   |  |
| Mif2-1             |                               |       |      | -16.2 | -5.3  | -3.6  | 5.3   | 5.3   |       | 3.0   |  |
| Mif2-2             | 7.9                           | -2.8  | 7.8  | -7.0  | -0.5  | -13.7 |       | -5.4  |       | -5.2  |  |
| Mtw1               |                               |       | 15.1 | -15.3 | -10.4 | -0.8  |       |       |       |       |  |
| Ndc80              | -15.0                         | -6.6  | -3.9 | -5.2  | -0.8  | -9.1  | 6.1   | -5.9  |       | -0.4  |  |
| Nkp1               |                               |       |      | -11.0 | 1.8   | 1.2   | 6.4   | 1.4   | -10.3 | 5.0   |  |
| Nkp2               |                               |       | -4.1 | 10.2  | -0.8  | 3.2   | 5.5   | 4.7   | 5.2   | 11.0  |  |
| Okp1               |                               | -18.0 | 0.5  | 11.3  | 1.2   | 3.8   | 2.5   | -3.1  | 0.7   | 2.4   |  |
| Spc105             |                               |       | -0.3 | 1.0   | -4.1  | -3.1  | 7.2   | -3.1  |       | 4.8   |  |
| Cse4 - High range  |                               |       |      |       |       | 10.5  | -3.3  | -6.0  | -1.8  | -0.6  |  |
| Mtw1 - High range  |                               |       |      |       |       | -2.5  | 2.2   | 6.1   | 10.7  |       |  |
| Analyte conc. (pM) | 78                            | 156   | 313  | 625   | 1250  | 2500  | 5000  | 10000 | 20000 | 60000 |  |

**S8 Table. Inter-day precision of calibrators (Tolerance:  $\pm 15\%$ ):**

Gray cells are outside the AMR (Tolerance:  $\pm 15\%$ ). Cells with yellow highlights have %CVs between -15% and -10% or 10% and 15%. The rest of the cells have %CVs within -10% and 10%.

| Peptide            | Calibrator %CV (n = 3) |      |     |      |      |      |      |       |       |       |
|--------------------|------------------------|------|-----|------|------|------|------|-------|-------|-------|
|                    | 78                     | 156  | 313 | 625  | 1250 | 2500 | 5000 | 10000 | 20000 | 60000 |
| Ame1               | 3.6                    | 2.9  | 1.7 | 5.8  | 2.6  | 3.2  | 0.7  | 2.4   | 1.0   | 0.6   |
| Cbf1               | 4.6                    | 5.5  | 5.0 | 2.2  | 0.7  | 5.0  |      | 4.0   | 2.7   | 6.6   |
| Cbf2               |                        |      |     | 6.5  | 5.0  | 4.8  | 5.3  | 1.8   | 2.2   | 1.7   |
| Cep3               | 11.2                   | 0.6  | 1.1 | 3.2  | 1.8  | 9.9  | 1.9  | 0.1   | 0.8   | 9.9   |
| Chl4               | 8.0                    | 6.5  | 7.9 | 3.9  | 5.1  | 6.0  | 2.0  | 1.7   | 1.7   | 1.1   |
| Cnn1               |                        |      |     |      |      | 1.3  | 1.4  | 5.1   | 7.7   |       |
| Cse4               |                        |      | 2.6 | 0.9  | 2.4  | 4.3  |      |       |       |       |
| Ctf13              |                        | 1.9  | 5.4 | 2.6  | 0.2  | 4.2  | 2.3  | 6.8   | 3.3   |       |
| Ctf19              |                        | 3.1  | 3.2 | 2.3  | 2.5  | 1.3  | 4.7  | 2.4   |       | 0.5   |
| Ctf3               | 14.5                   | 4.2  | 2.0 | 6.4  | 5.2  | 2.4  | 4.3  | 3.1   |       | 4.3   |
| Dsn1               | 14.1                   | 5.0  | 0.8 | 5.2  | 4.7  | 4.1  | 5.9  | 4.2   |       | 2.6   |
| Hhf1               |                        |      |     |      | 2.5  | 1.0  | 2.3  | 1.3   |       | 2.6   |
| Hht1               |                        |      | 5.3 | 10.6 | 3.7  | 1.7  | 2.1  | 6.2   | 7.2   | 4.5   |
| Hta2               | 3.4                    | 6.0  | 3.7 | 6.8  | 4.7  | 1.9  | 2.4  | 1.6   |       | 1.0   |
| Htb2               |                        |      |     | 2.3  | 2.6  | 4.3  | 2.6  | 2.9   | 2.9   | 5.3   |
| lml3               | 8.5                    | 4.5  | 1.4 | 4.7  | 9.5  | 2.5  | 2.9  | 4.1   | 3.2   | 0.9   |
| Mcm21              | 10.8                   | 2.2  | 1.4 | 0.1  | 0.4  | 4.1  | 2.7  | 1.2   | 0.5   | 2.6   |
| Mif2-1             |                        |      |     | 6.8  | 5.3  | 3.6  | 4.2  | 7.6   |       | 3.8   |
| Mif2-2             | 8.6                    | 7.5  | 2.1 | 5.9  | 7.4  | 5.5  |      | 5.5   |       | 3.5   |
| Mtw1               |                        |      | 1.9 | 2.2  | 1.0  | 1.5  |      |       |       |       |
| Ndc80              | 7.6                    | 10.2 | 9.4 | 5.0  | 4.9  | 2.8  | 5.3  | 10.0  |       | 3.4   |
| Nkp1               |                        |      |     | 2.6  | 4.0  | 3.2  | 7.3  | 8.1   | 8.4   | 6.5   |
| Nkp2               |                        |      | 5.3 | 6.1  | 1.7  | 7.8  | 4.4  | 5.8   | 3.7   | 5.3   |
| Okp1               |                        | 5.8  | 5.2 | 0.9  | 1.7  | 0.5  | 2.3  | 5.5   | 2.8   | 2.8   |
| Spc105             |                        |      | 6.4 | 6.1  | 12.9 | 3.5  | 0.6  | 2.8   |       | 4.6   |
| Cse4 - High range  |                        |      |     |      |      | 2.0  | 1.2  | 1.4   | 1.0   | 0.9   |
| Mtw1 - High range  |                        |      |     |      |      | 0.9  | 1.0  | 4.2   | 5.1   |       |
| Analyte conc. (pM) | 78                     | 156  | 313 | 625  | 1250 | 2500 | 5000 | 10000 | 20000 | 60000 |

**S9 Table. Quantifier and qualifier ions (L-CKP):** Quantifier and qualifier transition ions for the L-CKP and corresponding ion ratios as determined from the average of the calibrators.

| Peptide | Transitions |                |           |               | Quant/Qual ion ratio |
|---------|-------------|----------------|-----------|---------------|----------------------|
|         | Quantifier  | Quantifier m/z | Qualifier | Qualifier m/z |                      |
| Cbf1    | T - y10++   | 593.7704       | S - y11++ | 637.2864      | 1.33                 |
| Cep3    | Y - y5+     | 681.3566       | T - y3+   | 405.2092      | 5.62                 |
| Ctf13   | D - y4+     | 538.2620       | L - b3+   | 272.1605      | 1.10                 |
| Cse4    | A - y6+     | 764.4301       | L - y5+   | 693.3930      | 1.45                 |
| Htb2    | A - b2+     | 209.1033       | V - y6+   | 648.3311      | 1.94                 |
| Hta2    | P - y4+     | 428.2616       | F - y5+   | 575.3300      | 1.19                 |
| Hhf1    | Y - y5+     | 695.3359       | I - y6+   | 808.4199      | 1.19                 |
| Hht1    | E - y5+     | 643.4137       | L - y3+   | 401.2871      | 1.18                 |
| Mif2-1  | S - y5+     | 545.3042       | S - y7+   | 761.3788      | 1.43                 |
| Mif2-2  | L - y5+     | 765.4042       | Q - y4+   | 652.3202      | 0.58                 |
| Cbf2    | N - y9+     | 989.4283       | V - y10+  | 1088.4967     | 1.17                 |
| Mcm21   | D - b3+     | 344.1452       | D - y7+   | 793.3686      | 2.09                 |
| Ctf19   | D - y6+     | 747.3268       | S - y9+   | 1060.5269     | 2.01                 |
| Ctf3    | G - y9+     | 958.5680       | I - y4+   | 529.3457      | 0.98                 |
| lml3    | T - y4+     | 464.2463       | V - y5+   | 563.3148      | 1.89                 |
| Chl4    | P - y6+     | 734.4196       | D - y10+  | 1122.5426     | 2.74                 |
| Mtw1    | P - y11++   | 676.8277       | L - y7+   | 834.4468      | 1.68                 |
| Cnn1    | A - y2+     | 246.1561       | L - b10+  | 1131.6045     | 2.64                 |
| Nkp1    | E - y3+     | 417.2456       | D - y7+   | 862.3901      | 0.32                 |
| Nkp2    | S - y6+     | 704.3573       | L - y4+   | 488.2827      | 1.72                 |
| Ndc80   | D - y9+     | 1033.5273      | S - y7+   | 831.4683      | 1.47                 |
| Dsn1    | E - y9+     | 1154.4960      | Y - y7+   | 911.4105      | 0.97                 |
| Spc105  | Y - y5+     | 609.2991       | S - y4+   | 446.2358      | 0.78                 |
| Okp1    | Q - y5+     | 666.3206       | A - y4+   | 538.2620      | 1.20                 |
| Ame1    | D - y5+     | 605.3253       | E - y6+   | 734.3679      | 0.81                 |

**S10 Table. Quantifier and qualifier ions (H-CKP)**

| Peptide | Transitions |                |           |               | Quant/Qual ion ratio |
|---------|-------------|----------------|-----------|---------------|----------------------|
|         | Quantifier  | Quantifier m/z | Qualifier | Qualifier m/z |                      |
| Cbf1    | T - y10++   | 598.7745       | S - y11++ | 642.2905      | 1.33                 |
| Cep3    | Y - y5+     | 691.3649       | T - y3+   | 415.2175      | 5.62                 |
| Ctf13   | D - y4+     | 548.2703       | L - b3+   | 272.1605      | 1.10                 |
| Cse4    | A - y6+     | 774.4384       | L - y5+   | 703.4013      | 1.45                 |
| Htb2    | A - b2+     | 209.1033       | V - y6+   | 658.3394      | 1.94                 |
| Hta2    | P - y4+     | 438.2699       | F - y5+   | 585.3383      | 1.19                 |
| Hhf1    | Y - y5+     | 705.3442       | I - y6+   | 818.4282      | 1.19                 |
| Hht1    | E - y5+     | 653.4220       | L - y3+   | 411.2953      | 1.18                 |
| Mif2-1  | S - y5+     | 555.3125       | S - y7+   | 771.3871      | 1.43                 |
| Mif2-2  | L - y5+     | 775.4125       | Q - y4+   | 662.3284      | 0.58                 |
| Cbf2    | N - y9+     | 999.4365       | V - y10+  | 1098.505      | 1.17                 |
| Mcm21   | D - b3+     | 344.1452       | D - y7+   | 803.3769      | 2.09                 |
| Ctf19   | D - y6+     | 757.3350       | S - y9+   | 1070.535      | 2.01                 |
| Ctf3    | G - y9+     | 968.5763       | I - y4+   | 539.3539      | 0.98                 |
| lml3    | T - y4+     | 474.2546       | V - y5+   | 573.323       | 1.89                 |
| Chl4    | P - y6+     | 744.4278       | D - y10+  | 1132.551      | 2.74                 |
| Mtw1    | P - y11++   | 681.8318       | L - y7+   | 844.4551      | 1.68                 |
| Cnn1    | A - y2+     | 256.1643       | L - b10+  | 1131.604      | 2.64                 |
| Nkp1    | E - y3+     | 427.2539       | D - y7+   | 872.3984      | 0.32                 |
| Nkp2    | S - y6+     | 714.3656       | L - y4+   | 498.291       | 1.72                 |
| Ndc80   | D - y9+     | 1043.5355      | S - y7+   | 841.4766      | 1.47                 |
| Dsn1    | E - y9+     | 1164.5043      | Y - y7+   | 921.4188      | 0.97                 |
| Spc105  | Y - y5+     | 619.3074       | S - y4+   | 456.244       | 0.78                 |
| Okp1    | Q - y5+     | 676.3288       | A - y4+   | 548.2703      | 1.20                 |
| Ame1    | D - y5+     | 615.3336       | E - y6+   | 744.3762      | 0.81                 |

**S11 Table. Precision (%CV) of process replicates (n = 3) of ex vivo kinetochore reconstitutions**

| Peptide       | %CV  |      |      |      |      |
|---------------|------|------|------|------|------|
|               | M    |      |      | G1   |      |
|               | ARS  | CEN  | MUT  | CEN  | MUT  |
| <b>Ame1</b>   | 19.8 | 3.7  | 21.3 | 24.4 | 30.2 |
| <b>Cbf1</b>   | 78.0 | 13.3 | 10.4 | 11.7 | 23.4 |
| <b>Cbf2</b>   | 6.2  | 4.4  | 20.4 | 34.4 |      |
| <b>Cep3</b>   | 15.4 | 19.4 | 10.3 | 26.8 | 50.5 |
| <b>Chl4</b>   |      | 6.2  |      | 42.2 |      |
| <b>Cnn1</b>   |      | 4.4  |      |      |      |
| <b>Cse4</b>   | 5.2  | 7.2  | 6.3  | 43.5 |      |
| <b>Ctf13</b>  | 12.8 | 8.8  | 30.4 | 37.1 |      |
| <b>Ctf19</b>  | 9.6  | 12.9 | 12.0 | 8.9  | 18.9 |
| <b>Ctf3</b>   |      | 13.8 | 20.9 | 53.9 | 31.4 |
| <b>Dsn1</b>   | 4.0  | 0.7  | 4.7  | 5.6  | 9.5  |
| <b>Hhf1</b>   | 10.8 | 10.6 | 17.9 | 28.8 | 44.3 |
| <b>Hht1</b>   | 12.5 | 6.3  | 16.9 | 28.1 | 34.1 |
| <b>Hta2</b>   | 5.7  | 3.1  | 10.4 | 34.9 | 14.4 |
| <b>Htb2</b>   | 6.7  | 7.3  | 19.9 | 37.1 | 22.5 |
| <b>lml3</b>   |      | 15.5 | 23.6 | 36.6 | 41.2 |
| <b>Mcm21</b>  |      | 5.0  | 26.9 | 37.2 | 29.0 |
| <b>Mif2-1</b> |      | 8.6  |      |      |      |
| <b>Mif2-2</b> | 16.5 | 12.5 |      | 36.8 |      |
| <b>Mtw1</b>   | 10.4 | 4.2  | 11.4 | 18.4 | 36.1 |
| <b>Ndc80</b>  |      | 17.9 |      |      |      |
| <b>Nkp1</b>   |      | 1.4  |      |      |      |
| <b>Nkp2</b>   |      | 40.8 |      |      |      |
| <b>Okp1</b>   |      | 9.1  | 9.8  | 31.9 | 24.2 |
| <b>Spc105</b> |      |      |      |      |      |

%CVs were not calculated for measurements < lower limit of quantification, which are shown as empty cells in the table above.
